# Supplementary material
Source: Springer Nature journal article supplement (https://www.springermedizin.de/resource/supplementary/12967_2014_1885_MOESM4_ESM.pdf/9575044)
Supplement: MOESM4 [file 9575044]

Genes over-expressed in both LipoD-B vs LipoD-A and UPS-B vs UPS-A

| Gene Symbol | Fold Change (Up in LipoD-B vs LipoD-A) | Fold Change (Up in UPS-B vs UPS-A) |
|-------------|----------------------------------------|------------------------------------|
| TSPAN5      | 9.0                                    | 4.7                                |
| TRIM59      | 5.6                                    | 3.1                                |
| SQLE        | 2.7                                    | 3.3                                |
| RUNX2       | 26.4                                   | 7.8                                |
| RRM2        | 14.8                                   | 3.3                                |
| RAB27A      | 2.5                                    | 4.2                                |
| MICAL2      | 13.2                                   | 10.9                               |
| LEF1        | 8.6                                    | 4.6                                |
| KDEL3       | 4.3                                    | 3.1                                |
| FZD2        | 3.4                                    | 2.6                                |
| FN1         | 9.8                                    | 3.6                                |
| CTHRC1      | 7.9                                    | 5.5                                |
| CHN1        | 2.9                                    | 3.1                                |
| ADAM19      | 4.2                                    | 3.8                                |
| ABCC4       | 4.3                                    | 3.1                                |
